# Supplementary material for: TIM-3 levels correlate with enhanced NK cell cytotoxicity and improved clinical outcome in AML patients
Source: PubMed Central journal article supplement — Oncoimmunology. 2021 Mar 8;10(1):1889822. doi: 10.1080/2162402X.2021.1889822 (PMC7946028; doi:10.1080/2162402x.2021.1889822), 2021-03-08
Supplement: KONI_A_1889822_SM6038.pdf [file KONI_A_1889822_SM6038.pdf]

Supplemental Material

Supplemental figures

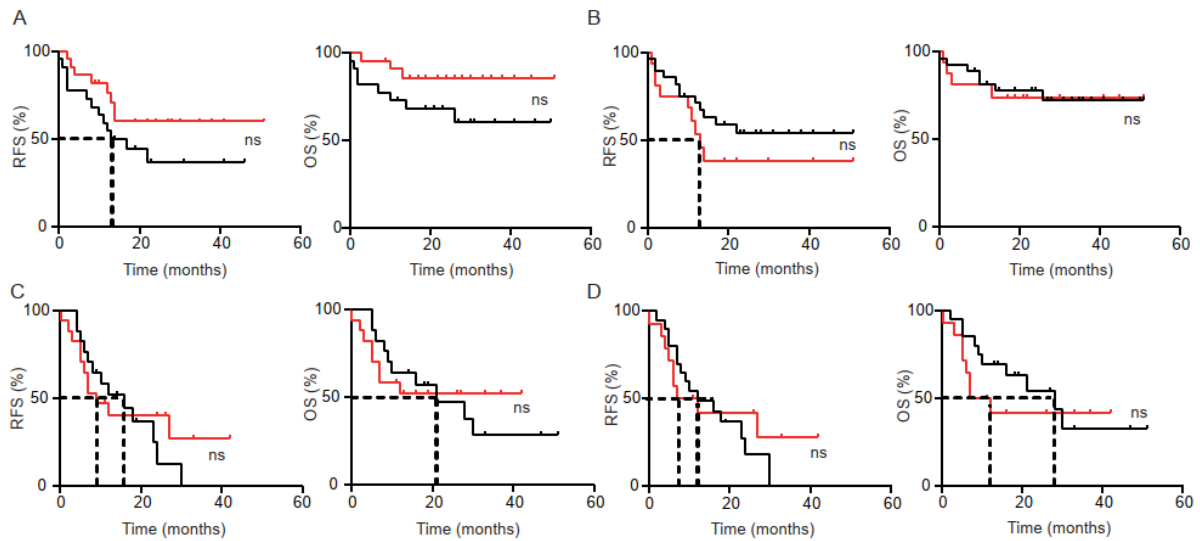

**Supplemental figure 1. The prognostic role of CD45<sup>+</sup>CD3<sup>-</sup>CD56<sup>dim</sup> and CD45<sup>+</sup>CD3<sup>-</sup>CD56<sup>bright</sup> NK cells in M1+2 and M4+5 AML patients**

RFS and OS of 41 M1+2 AML patients stratified based on median percentage of circulating CD45<sup>+</sup>CD3<sup>-</sup>CD56<sup>dim</sup> NK cells (A) and CD45<sup>+</sup>CD3<sup>-</sup>CD56<sup>bright</sup> NK cells (B). RFS and OS of 34 M4+5 AML patients stratified based on median percentage of circulating CD45<sup>+</sup>CD3<sup>-</sup>CD56<sup>dim</sup> NK cells (C) and CD45<sup>+</sup>CD3<sup>-</sup>CD56<sup>bright</sup> NK cells (D). Survival curves were estimated by the Kaplan-Meier method and differences between groups were evaluated using log-rank test. Number of patients at risk is reported.

A

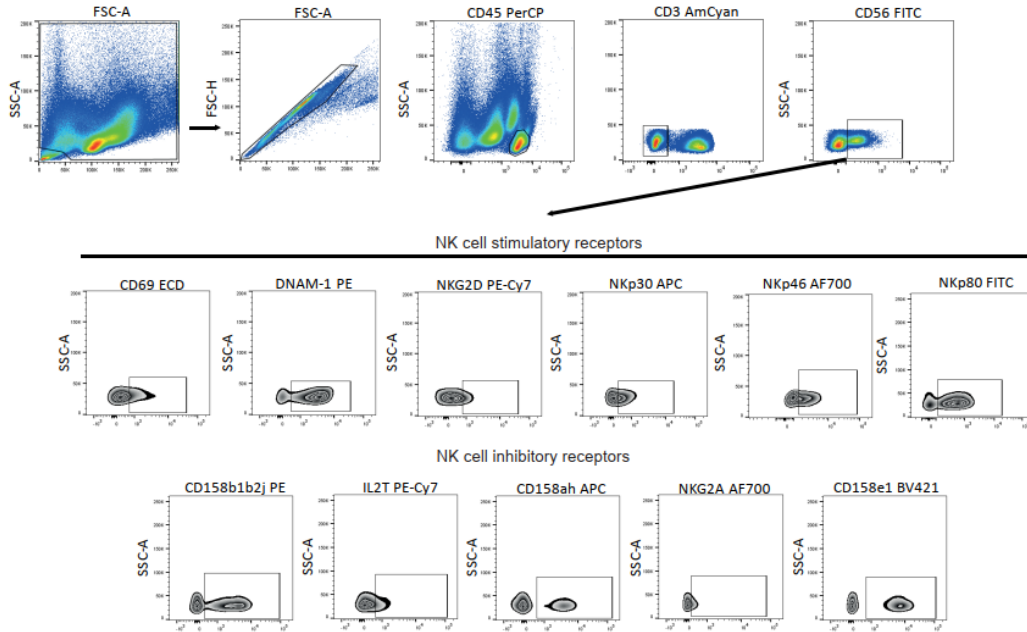

B

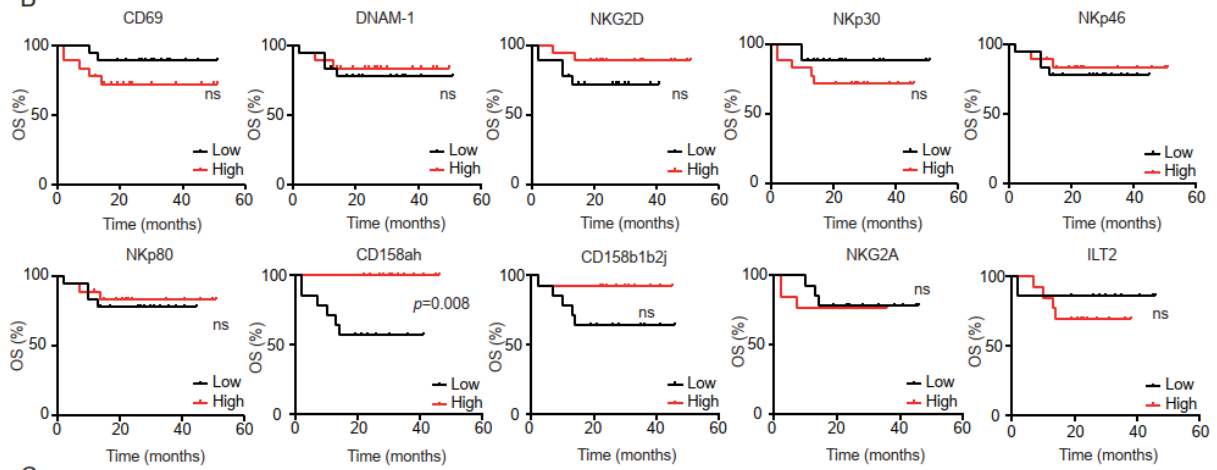

C

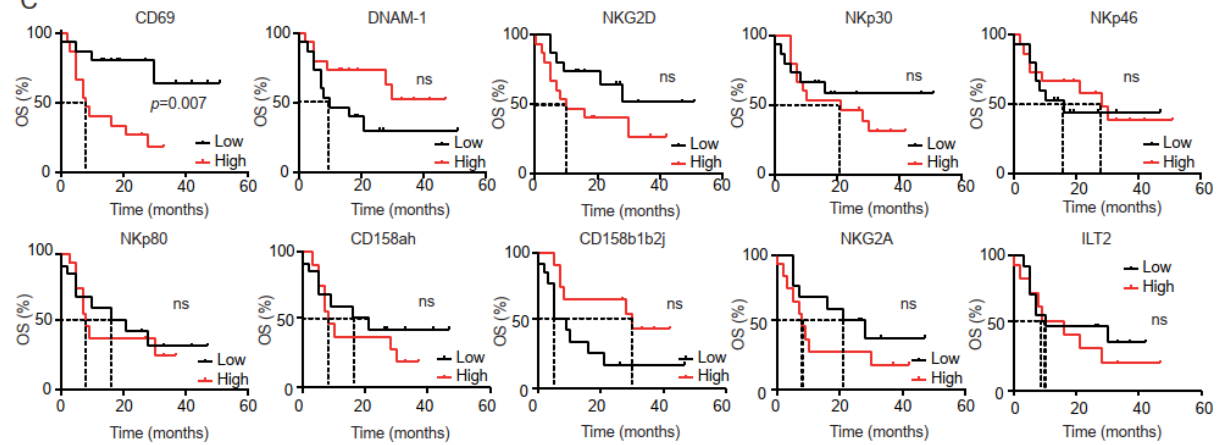

**Supplemental figure 2. The prognostic role of NK cells associated receptors in M1+2 and M4+5 AML patients**

(A) Gating strategy for CD69, DNAM-1, NKG2D, NKp30, NKp46, NKp80, DNAM-1, CD158b1b2j, IL2T, CD158ah, NKG2A and CD158e1 CD45<sup>+</sup>CD3<sup>-</sup>CD56<sup>+</sup> NK cells.

OS of 41 M1+2 (B) and 34 M4+5 (C) AML patients based on median percentage of CD69, DNAM-1, NKG2D, NKp30, NKp46, NKp80, DNAM-1, CD158b1b2j, IL2T, CD158ah, NKG2A and CD158e1 CD45<sup>+</sup>CD3<sup>-</sup>CD56<sup>+</sup> NK cells. Survival curves were estimated by the Kaplan-Meier method and differences between groups were evaluated using log-rank test.

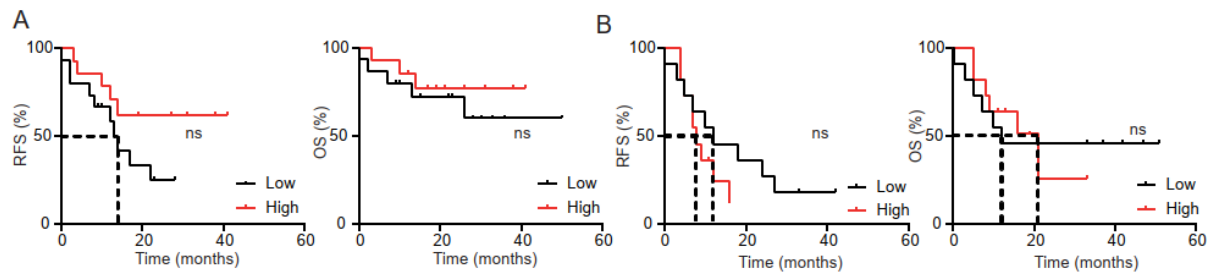

**Supplemental figure 3. The prognostic role of cytotoxic NK cells in M1+2 and M4+5 AML patients**

RFS and OS of 41 M1+M2 (A) and 34 M4+5 (B) AML patients based on the percentage of IFN- $\gamma^+$  CD45 $^+$ CD3 $^-$ CD56 $^+$  NK cells after PMA + Ionomycin stimulation. Survival curves were estimated by the Kaplan-Meier method and differences between groups were evaluated using log-rank test. Number of patients at risk is reported.

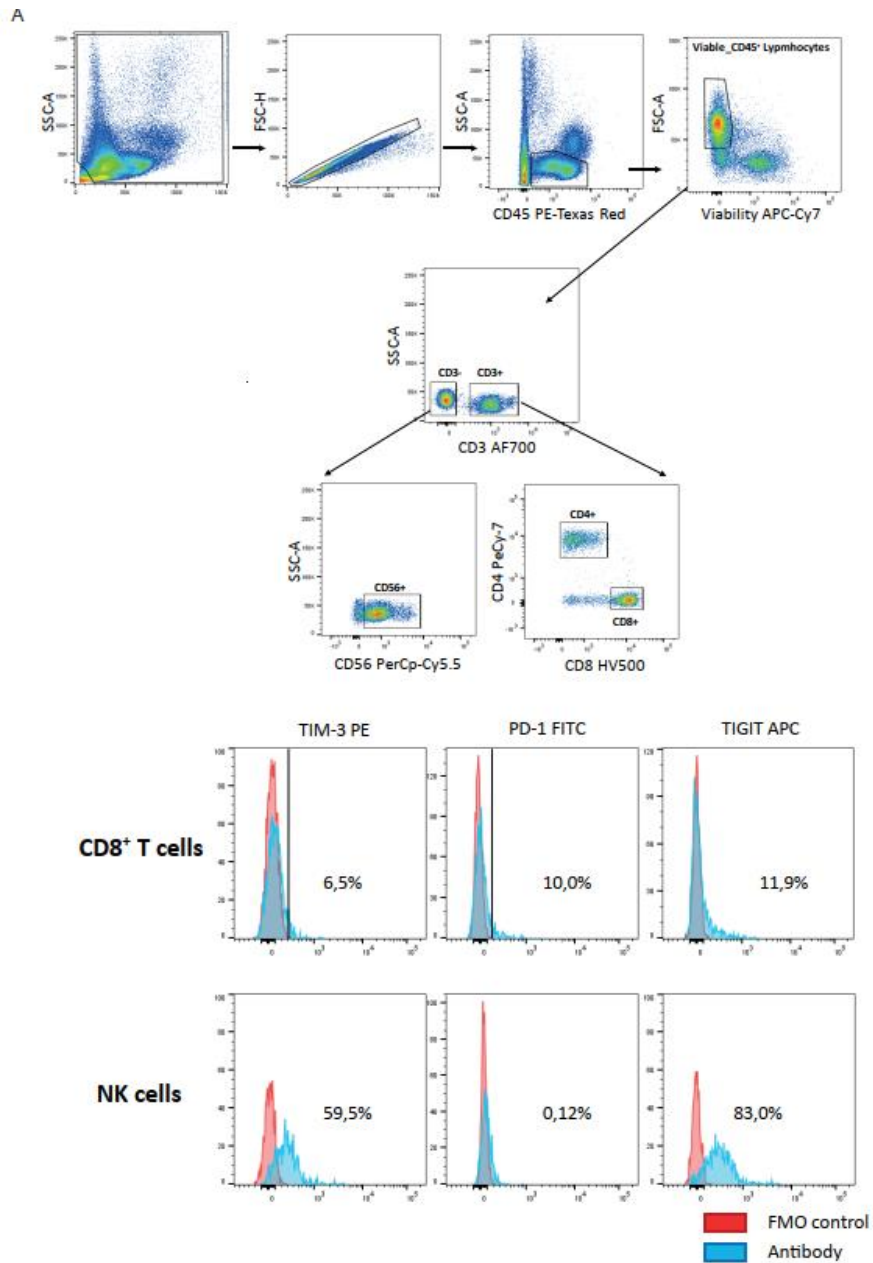

**Supplemental figure 4. Gating strategy for TIM-3<sup>+</sup>, PD-1<sup>+</sup> and TIGIT<sup>+</sup> CD45<sup>+</sup>CD3<sup>-</sup> CD56<sup>+</sup> NK cells and CD8<sup>+</sup> T cells in AML patients.**

A

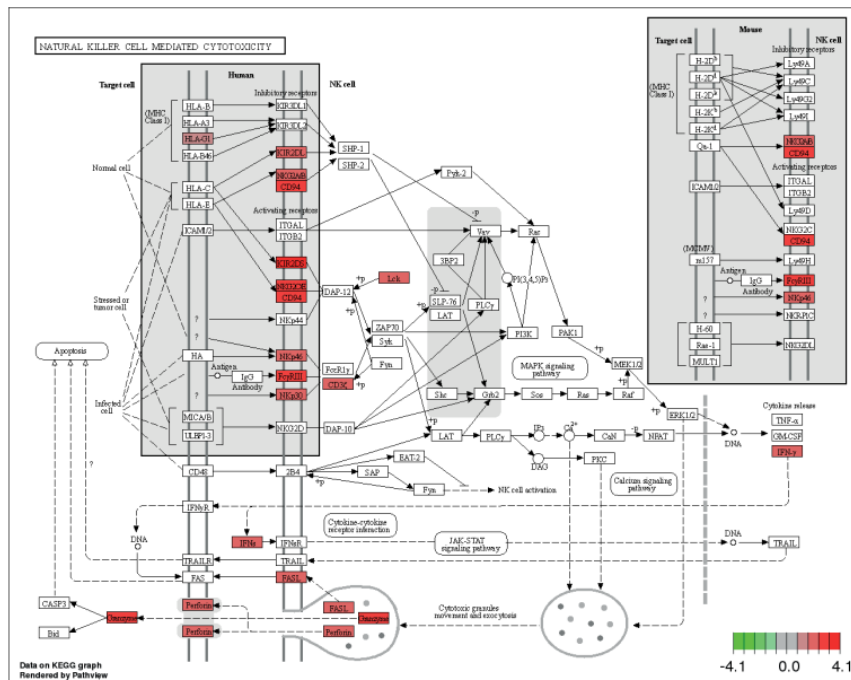

B

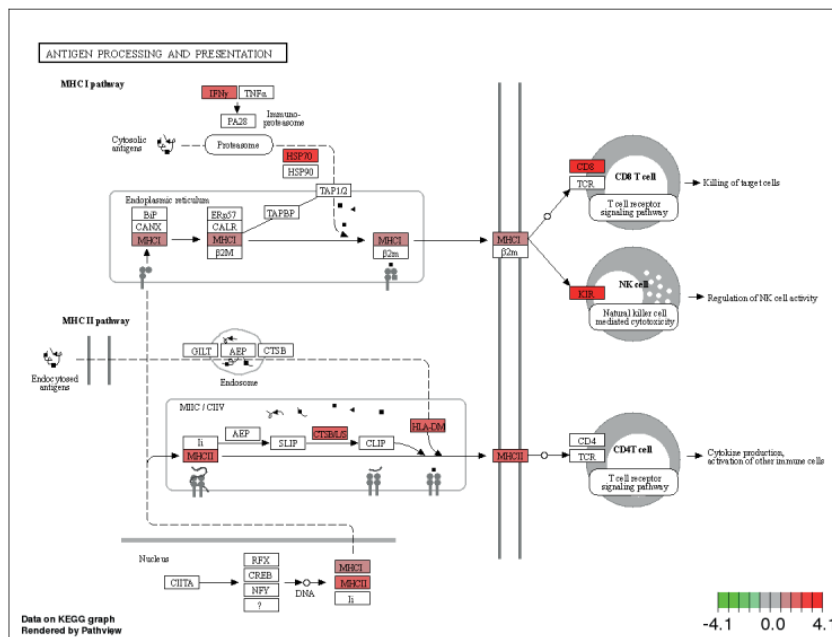

**Supplemental figure 5. KEGG pathway enrichment analysis in TIM<sup>Hi</sup> NK cells AML patients**

KEGG analyses of differentially expressed genes associated with natural killer cell cytotoxicity (A) and antigen processing and presentation (B) pathways significantly upregulated in TIM-3<sup>Hi</sup> NK cell AML patients, as determined by RNA-sequencing.

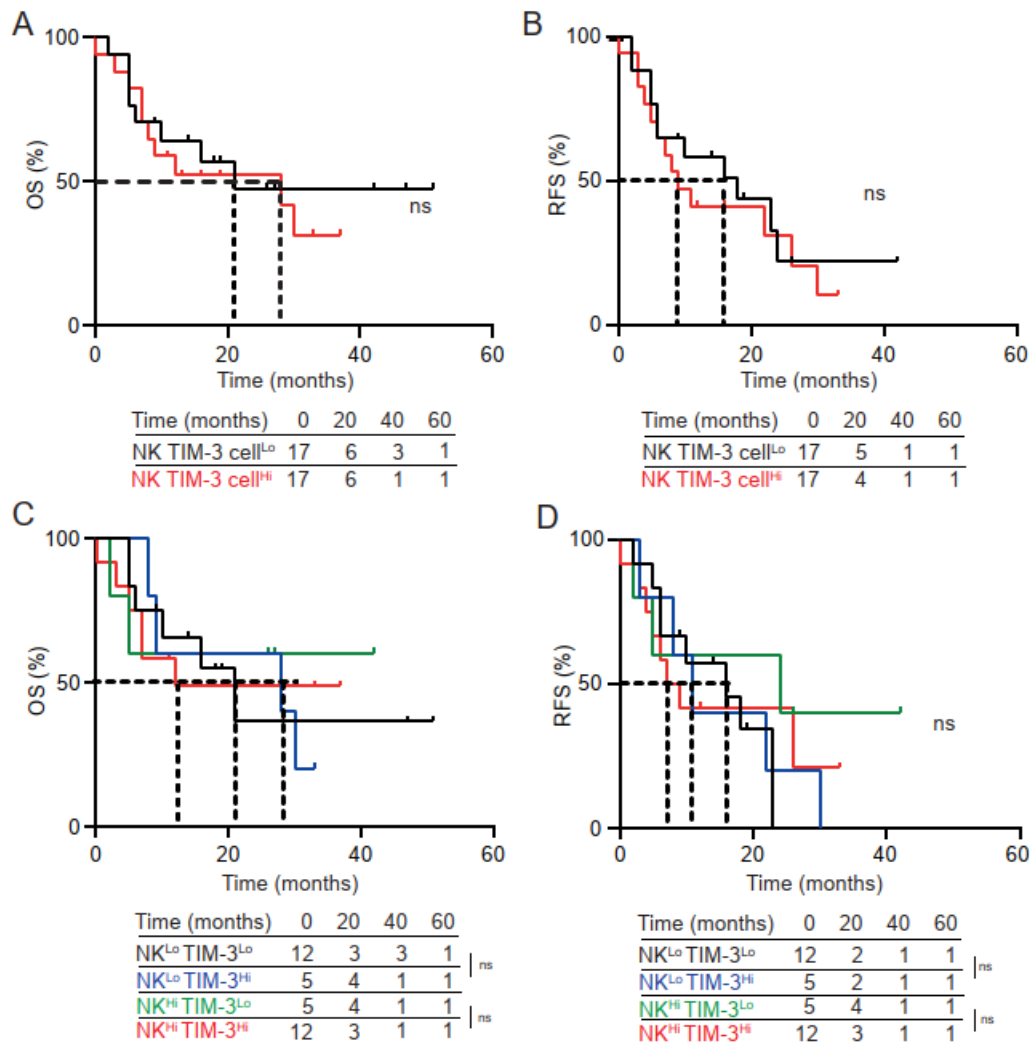

**Supplemental figure 6. TIM-3 exposure of NK cells correlates with improve relapse free survival in AML patients**

(A) OS and (B) RFS of 34 M4+5 AML patients stratified based on median percentage of circulating TIM-3<sup>+</sup>CD45<sup>+</sup>CD3<sup>-</sup>CD56<sup>+</sup> NK cells. (C) OS and (D) RFS of 34 M4+5 AML patients stratified based on median percentage of circulating TIM-3<sup>+</sup>CD45<sup>+</sup>CD3<sup>-</sup>CD56<sup>+</sup> NK cells and CD45<sup>+</sup>CD3<sup>-</sup>CD56<sup>+</sup> NK cells. Survival curves were estimated by the Kaplan-Meier method and differences between groups were evaluated using log-rank test. Number of patients at risk is reported.

| Parameter                        | source | Producer          | Clone       | Fluorochrome         | Dilution |
|----------------------------------|--------|-------------------|-------------|----------------------|----------|
| <b>CCR7</b>                      | mouse  | BioLegend         | G043H7      | PerCP-Cy5.5          | 6:100    |
| <b>CD3</b>                       | mouse  | EXBIO             | MEM-57      | Alexa Fluor 700      | 5:100    |
| <b>CD3</b>                       | mouse  | BD Biosciences    | SK7         | AmCyan               | 6:100    |
| <b>CD4</b>                       | mouse  | eBioscience       | RPA-T4      | PE-Cy7               | 5:100    |
| <b>CD4</b>                       | mouse  | Beckman Coulter   | SFCI12T4D11 | ECD                  | 5:100    |
| <b>CD8</b>                       | mouse  | BD Biosciences    | RPA-T8      | HV500                | 5:100    |
| <b>CD11c</b>                     | mouse  | EXBIO             | BU15        | APC                  | 6:100    |
| <b>CD14</b>                      | mouse  | EXBIO             | MEM-15      | FITC                 | 6:100    |
| <b>CD16</b>                      | mouse  | BioLegend         | 3G8         | Pacific Blue         | 6:100    |
| <b>CD45</b>                      | mouse  | BD Biosciences    | HI30        | HV500                | 5:100    |
| <b>CD45</b>                      | mouse  | Life Technologies | HI30        | PE-Texas Red         | 6:100    |
| <b>CD45</b>                      | mouse  | EXBIO             | MEM-28      | PerCP                | 6:100    |
| <b>CD45</b>                      | mouse  | BioLegend         | HI30        | Pacific Blue         | 6:100    |
| <b>CD45</b>                      | mouse  | EXBIO             | MEM-28      | PE                   | 2:100    |
| <b>CD45</b>                      | mouse  | EXBIO             | MEM-56      | RA PE                | 6:100    |
| <b>CD56</b>                      | mouse  | Beckman Coulter   | N901        | ECD                  | 3:100    |
| <b>CD56</b>                      | mouse  | BioLegend         | MEM-188     | PerCP-Cy5.5          | 6:100    |
| <b>CD56</b>                      | mouse  | EXBIO             | MEM-188     | FITC                 | 6:100    |
| <b>CD62L</b>                     | mouse  | EXBIO             | DREG56      | FITC                 | 5:100    |
| <b>CD69</b>                      | mouse  | Beckmann Coulter  | TP1.55.3    | ECD                  | 6:100    |
| <b>CD86</b>                      | mouse  | BD Biosciences    | FUN-1       | Alexa Fluor 700      | 6:100    |
| <b>CD107a</b>                    | mouse  | BioLegend         | H4A3        | FITC                 | 8:100    |
| <b>CD158a/h/g</b>                | mouse  | eBioscience       | HP-MA4      | APC                  | 6:100    |
| <b>CD158b1/b2,j</b>              | mouse  | Beckman Coulter   | GL183       | PE                   | 6:100    |
| <b>CD158e1</b>                   | mouse  | BioLegend         | DX9         | Brilliant Violet 421 | 6:100    |
| <b>DNAM-1</b>                    | mouse  | BioLegend         | 11A8        | PE                   | 6:100    |
| <b>Granzyme B</b>                | mouse  | BD Biosciences    | GB11        | Brilliant Violet 421 | 4:100    |
| <b>HLA-DR</b>                    | mouse  | BD Biosciences    | L243        | PE-Cy7               | 6:100    |
| <b>IFN-<math>\gamma</math></b>   | mouse  | eBioscience       | 4S.B3       | PE-Cy7               | 1:100    |
| <b>ILT2</b>                      | mouse  | BioLegend         | GHI/75      | PE-Cy7               | 6:100    |
| <b>IL-15R<math>\alpha</math></b> | mouse  | BioLegend         | JM7A4       | PE                   | 6:100    |
| <b>NKG2A</b>                     | mouse  | R&D Systems       | 131411      | Alexa Fluor 700      | 6:100    |
| <b>NKG2D</b>                     | mouse  | BioLegend         | 1D11        | PE-Cy7               | 6:100    |
| <b>NKp30</b>                     | mouse  | BioLegend         | P30-15      | APC                  | 6:100    |
| <b>NKp46</b>                     | mouse  | BioLegend         | 9E 2        | Alexa Fluor 700      | 6:100    |
| <b>NKp80</b>                     | mouse  | Miltenyi Biotec   | 4A4.D10     | FITC                 | 6:100    |



|                 |       |           |          |             |       |
|-----------------|-------|-----------|----------|-------------|-------|
| <b>Perforin</b> | mouse | BioLegend | dG9      | APC         | 4:100 |
| <b>PD-1</b>     | mouse | BioLegend | EH12.2H7 | APC         | 6:100 |
| <b>PD-1</b>     | mouse | BioLegend | EH12.2H7 | FITC        | 6:100 |
| <b>TIGIT</b>    | mouse | BioLegend | A15153G  | APC         | 6:100 |
| <b>TIGIT</b>    | mouse | BioLegend | A15153G  | PerCP/Cy5.5 | 6:100 |
| <b>TIM3</b>     | mouse | BioLegend | E38-2E2  | PE          | 3:100 |

**Supplemental Table 1.** The list of antibodies used for flow cytometry

| <b>Variable</b>                   | <b>Total<br/>(n=14)</b>              |
|-----------------------------------|--------------------------------------|
| <b><i>Subtypes (FAB)</i></b>      | M1+M2 (9)<br>M4+M5 (5)<br>Total (14) |
| <b><i>Age at diagnosis</i></b>    |                                      |
| < 50 years                        | 8 (57%)                              |
| ≥ 50 years                        | 6 (43%)                              |
| Median (years)                    | 46                                   |
| Range (years)                     | 36-73                                |
| <b><i>Sex</i></b>                 |                                      |
| Male                              | 4 (29%)                              |
| Female                            | 10 (71%)                             |
| <b><i>Cytogenetic profile</i></b> |                                      |
| Favorable                         | 2 (14%)                              |
| Intermediate                      | 8 (72%)                              |
| Unfavorable                       | 2 (14%)                              |

**Supplemental Table 2.** Main clinical and biological characteristic of AML patients analysed by RNA-sequencing

| Gene symbol | Fold Change (log2) | adj. p-value |
|-------------|--------------------|--------------|
| KIAA0319    | 4.06               | 0.022084661  |
| NFIB        | 4.06               | 0.00305005   |
| CCL4        | 3.30               | 3.4092E-05   |
| SPESP1      | 3.24               | 0.001093202  |
| CXCL5       | 3.17               | 0.001093202  |
| TUBB1       | 3.07               | 0.001093202  |
| CCL4L2      | 3.06               | 0.002304125  |
| GPAT2       | 3.00               | 0.002596374  |
| CXCL8       | 2.99               | 0.002547165  |
| KCNJ15      | 2.96               | 0.002279718  |
| ADM         | 2.94               | 0.000609085  |
| DMRTC2      | 2.93               | 0.007900631  |
| GNAZ        | 2.91               | 7.60439E-05  |
| TRAPPC3L    | 2.91               | 0.003150989  |
| FCGR3A      | 2.86               | 0.049817777  |
| SPOCD1      | 2.85               | 0.005441447  |
| CNN1        | 2.84               | 0.006633405  |
| SCGB1C1     | 2.84               | 0.00922574   |
| NR4A3       | 2.82               | 0.015718923  |
| TGFBR3      | 2.80               | 0.000203304  |
| S1PR5       | 2.75               | 0.000880611  |
| DTHD1       | 2.75               | 0.002279718  |
| SLC1A7      | 2.73               | 0.005248438  |
| GOS2        | 2.71               | 0.00690746   |
| PPP2R2B     | 2.67               | 0.002046256  |
| LINGO2      | 2.64               | 0.016952589  |
| GZMH        | 2.63               | 0.00231749   |
| LYVE1       | 2.62               | 0.009167711  |
| GZMB        | 2.61               | 0.002046256  |
| APOBEC3A    | 2.59               | 0.002046256  |
| FFAR2       | 2.59               | 0.005759365  |
| FCRL6       | 2.57               | 0.002370032  |
| KLRD1       | 2.57               | 0.000880611  |
| CYP1B1      | 2.57               | 0.012561753  |
| HSPA6       | 2.56               | 0.003285611  |
| MYBL1       | 2.55               | 0.000951806  |
| KLRC2       | 2.55               | 0.010583001  |
| TIGIT       | 2.55               | 0.049483884  |
| UNC45B      | 2.55               | 0.002613539  |
| KU645196.1  | 2.54               | 0.026809791  |
| DUSP8       | 2.54               | 0.000680045  |
| TBX21       | 2.54               | 0.002370032  |
| KU645196.2  | 2.53               | 0.027583132  |
| ENKUR       | 2.53               | 0.002259564  |
| IL32        | 2.52               | 0.001160956  |
| PDZD4       | 2.51               | 0.003693448  |
| LDHAL6A     | 2.50               | 0.023594384  |
| LLCFC1      | 2.50               | 0.03031433   |
| BTNL3       | 2.49               | 0.022123665  |

|          |      |             |
|----------|------|-------------|
| FFAR1    | 2.48 | 0.035662512 |
| IL2RB    | 2.48 | 0.001687281 |
| TPRGI    | 2.48 | 0.003403205 |
| SCGB1C2  | 2.47 | 0.036377476 |
| SPDYC    | 2.46 | 0.013990923 |
| NTN4     | 2.45 | 0.013108379 |
| TRPV4    | 2.45 | 0.025747157 |
| REM2     | 2.45 | 0.004561715 |
| CABP5    | 2.45 | 0.025846156 |
| PRSS22   | 2.44 | 0.03431436  |
| PTGS2    | 2.44 | 0.018151863 |
| PF4      | 2.44 | 0.024944448 |
| GZMA     | 2.44 | 0.001446301 |
| RGS9     | 2.43 | 0.002259564 |
| CTTN     | 2.42 | 0.005575856 |
| ADRA2B   | 2.42 | 0.035662512 |
| PVALB    | 2.41 | 0.043511916 |
| DGKK     | 2.41 | 0.031241957 |
| RORA     | 2.41 | 0.001612909 |
| TRHDE    | 2.40 | 0.037194059 |
| NCKAP1   | 2.40 | 0.000637085 |
| CACNA1E  | 2.40 | 0.028212223 |
| SGK1     | 2.40 | 0.008116269 |
| VIL1     | 2.39 | 0.003386334 |
| MCC      | 2.39 | 0.006080319 |
| CCDC74A  | 2.39 | 0.030051305 |
| CD8A     | 2.38 | 0.004902559 |
| CD8B2    | 2.37 | 0.000678669 |
| FAM110C  | 2.37 | 0.032480397 |
| NPHS1    | 2.37 | 0.041129351 |
| GNAO1    | 2.37 | 0.005045372 |
| PPBP     | 2.37 | 0.024636701 |
| HLA-DRB1 | 2.36 | 0.027051992 |
| B3GAT1   | 2.36 | 0.007007965 |
| CREB5    | 2.36 | 0.012537124 |
| PYHIN1   | 2.36 | 0.001455535 |
| FASLG    | 2.35 | 0.013108379 |
| STEAP4   | 2.34 | 0.03342556  |
| SMPDL3A  | 2.34 | 0.021541491 |
| SFN      | 2.33 | 0.005441447 |
| PRF1     | 2.33 | 0.002499855 |
| PCSK6    | 2.33 | 0.009186177 |
| ABLIM3   | 2.32 | 0.020456819 |
| NUAK2    | 2.32 | 0.005441447 |
| UTS2     | 2.32 | 0.013119527 |
| TMEM119  | 2.31 | 0.005738826 |
| GZMM     | 2.31 | 0.003016633 |
| IFNG     | 2.30 | 0.030589081 |
| RGS6     | 2.29 | 0.007855192 |
| GPR68    | 2.29 | 0.00623777  |

|            |      |             |
|------------|------|-------------|
| GRB14      | 2.29 | 0.028212223 |
| PADI2      | 2.29 | 0.012945974 |
| GU182347.1 | 2.29 | 0.034282691 |
| PDE5A      | 2.28 | 0.013567296 |
| HEY2       | 2.28 | 0.034447682 |
| CRYBG2     | 2.28 | 0.002721092 |
| CALD1      | 2.28 | 0.024944448 |
| CCIN       | 2.28 | 0.009759026 |
| LEXM       | 2.27 | 0.009186177 |
| TTC16      | 2.26 | 0.008072511 |
| RAMP3      | 2.26 | 0.038296073 |
| EOMES      | 2.26 | 0.008116269 |
| BEND2      | 2.26 | 0.033982336 |
| SIGLEC10   | 2.26 | 0.002499855 |
| TLE2       | 2.25 | 0.004902559 |
| SAMD3      | 2.25 | 0.005467982 |
| MYEOV      | 2.25 | 0.022327306 |
| NOX5       | 2.25 | 0.048189773 |
| FRMPD3     | 2.24 | 0.017888894 |
| SLC45A4    | 2.24 | 0.047701493 |
| AQP9       | 2.24 | 0.035604381 |
| TMPRSS6    | 2.24 | 0.01122817  |
| XCL2       | 2.23 | 0.004385227 |
| PCDH1      | 2.22 | 0.035191454 |
| GZMK       | 2.22 | 0.012537124 |
| GNLY       | 2.22 | 0.020456819 |
| HEATR9     | 2.22 | 0.005045372 |
| FAM71A     | 2.21 | 0.049062651 |
| NRN1       | 2.20 | 0.017805223 |
| SEC14L5    | 2.20 | 0.01122817  |
| CD247      | 2.20 | 0.006892211 |
| AC068775.1 | 2.19 | 0.035311219 |
| MCOLN2     | 2.18 | 0.005759365 |
| CAMK1      | 2.18 | 0.022084661 |
| SELP       | 2.18 | 0.022084661 |
| SYNE2      | 2.18 | 0.008072511 |
| NAMPT      | 2.17 | 0.012945974 |
| ZNF365     | 2.16 | 0.044900713 |
| PLCH2      | 2.16 | 0.007280783 |
| PDCD1      | 2.16 | 0.015453972 |
| SOX13      | 2.16 | 0.034209486 |
| NSG1       | 2.16 | 0.017174011 |
| CCL5       | 2.16 | 0.009167711 |
| RORC       | 2.16 | 0.005425757 |
| KU645196.5 | 2.15 | 0.018289187 |
| FXYP7      | 2.14 | 0.038563027 |
| LGR6       | 2.14 | 0.013775286 |
| ITGB5      | 2.14 | 0.016264443 |
| CD300LD    | 2.14 | 0.045061122 |
| RGS17      | 2.14 | 0.042649094 |

|             |      |             |
|-------------|------|-------------|
| CXCL10      | 2.14 | 0.031241957 |
| KIR3DS1     | 2.14 | 0.01969768  |
| RBPMS2      | 2.13 | 0.028212223 |
| PHLDB2      | 2.13 | 0.00440266  |
| CD8B        | 2.13 | 0.018151863 |
| KLRC1       | 2.12 | 0.028212223 |
| AOC3        | 2.11 | 0.041597202 |
| KIF5C       | 2.11 | 0.007200822 |
| MPIG6B      | 2.11 | 0.017888894 |
| SNX25       | 2.11 | 0.000951806 |
| OSM         | 2.10 | 0.01705098  |
| PDZK1IP1    | 2.10 | 0.026372812 |
| CD3E        | 2.10 | 0.018171369 |
| SOWAHC      | 2.09 | 0.037578195 |
| PLIN4       | 2.09 | 0.022711157 |
| HCAR3       | 2.09 | 0.022311285 |
| AC011476.9  | 2.09 | 0.019201377 |
| AC011476.4  | 2.09 | 0.019201377 |
| AC011476.10 | 2.09 | 0.019201377 |
| AC011476.11 | 2.09 | 0.019201377 |
| AC011476.5  | 2.09 | 0.019201377 |
| AC011476.6  | 2.09 | 0.019201377 |
| RASGRF2     | 2.09 | 0.009186177 |
| THEMIS      | 2.08 | 0.01913541  |
| ETV7        | 2.08 | 0.040101371 |
| PROS1       | 2.08 | 0.019663695 |
| ARAP3       | 2.08 | 0.021373057 |
| AL133414.4  | 2.07 | 0.043314024 |
| TMPRSS3     | 2.07 | 0.032370032 |
| KREMEN1     | 2.07 | 0.042239212 |
| INKA2       | 2.07 | 0.021326499 |
| PPP1R3B     | 2.07 | 0.006633405 |
| CD160       | 2.06 | 0.0099068   |
| BNC2        | 2.05 | 0.022311285 |
| TSPAN18     | 2.05 | 0.006544594 |
| GP9         | 2.04 | 0.024136213 |
| AOC2        | 2.03 | 0.049085523 |
| CCL3        | 2.03 | 0.034768778 |
| PLEKHG3     | 2.03 | 0.025846156 |
| GRAP2       | 2.02 | 0.02102085  |
| CACNA2D2    | 2.02 | 0.019643903 |
| ZNF483      | 2.01 | 0.023639653 |
| OR52K1      | 2.01 | 0.038563027 |
| OR52K2      | 2.01 | 0.047701493 |
| GPR25       | 2.00 | 0.013971708 |
| ZBP1        | 2.00 | 0.030589081 |
| FCRL3       | 1.99 | 0.007538977 |
| CX3CR1      | 1.98 | 0.029360577 |
| LILRB3      | 1.98 | 0.044936741 |
| ACSL6       | 1.97 | 0.010835451 |

|            |      |             |
|------------|------|-------------|
| XCL1       | 1.96 | 0.02061213  |
| ELOVL7     | 1.96 | 0.040733711 |
| SOCS3      | 1.96 | 0.003065353 |
| CD3G       | 1.95 | 0.04212533  |
| BCL6       | 1.95 | 0.016767959 |
| RASGRP1    | 1.95 | 0.011170334 |
| BCL11B     | 1.94 | 0.025747157 |
| LCK        | 1.94 | 0.017888894 |
| TMEM169    | 1.94 | 0.013584708 |
| NINJ1      | 1.93 | 0.036377476 |
| CTLA4      | 1.93 | 0.033510841 |
| BICDL1     | 1.93 | 0.022327306 |
| PRSS23     | 1.92 | 0.041380759 |
| NCR1       | 1.92 | 0.025846156 |
| HCAR2      | 1.91 | 0.038563027 |
| SOD2       | 1.91 | 0.013080402 |
| FCGR2A     | 1.90 | 0.038585325 |
| CR1        | 1.90 | 0.045239126 |
| SLC30A4    | 1.90 | 0.005355729 |
| DNAH8      | 1.89 | 0.045783287 |
| NRGN       | 1.89 | 0.049672701 |
| AC034228.3 | 1.89 | 0.007047204 |
| AC139491.7 | 1.89 | 0.043384792 |
| CLIC5      | 1.88 | 0.016297162 |
| SCML1      | 1.87 | 0.009186177 |
| IKZF3      | 1.87 | 0.009529302 |
| FBXL16     | 1.87 | 0.034282691 |
| NEDD9      | 1.87 | 0.034272866 |
| BCL2A1     | 1.86 | 0.040347781 |
| IGF2R      | 1.85 | 0.045030606 |
| EPHA4      | 1.85 | 0.038002331 |
| ZFP36L1    | 1.85 | 0.023639653 |
| SUSD4      | 1.85 | 0.043314024 |
| PTGDR      | 1.84 | 0.024828194 |
| NR4A1      | 1.83 | 0.048019866 |
| CTSL       | 1.82 | 0.047701493 |
| CEBPB      | 1.81 | 0.008563943 |
| IL18RAP    | 1.81 | 0.025667781 |
| NCAM1      | 1.81 | 0.030589081 |
| CCDC65     | 1.80 | 0.037500999 |
| AFDN       | 1.80 | 0.00963224  |
| LTA        | 1.79 | 0.034762269 |
| SBK1       | 1.79 | 0.018578574 |
| BOK        | 1.79 | 0.046479796 |
| GALM       | 1.78 | 0.015076917 |
| Clorf61    | 1.78 | 0.007047204 |
| MXD1       | 1.78 | 0.037985423 |
| RADX       | 1.77 | 0.041380759 |
| MAPK13     | 1.77 | 0.029778135 |
| ADGRB2     | 1.77 | 0.033903119 |

|           |      |             |
|-----------|------|-------------|
| CSF2RB    | 1.76 | 0.023823162 |
| ICOS      | 1.76 | 0.044935541 |
| TNFSF14   | 1.75 | 0.047701493 |
| C13orf46  | 1.74 | 0.030511106 |
| DOCK9     | 1.73 | 0.037985423 |
| MAN1C1    | 1.72 | 0.014345453 |
| PRDM1     | 1.72 | 0.022535981 |
| MAK       | 1.70 | 0.049151306 |
| PERP      | 1.70 | 0.04655761  |
| SELENOM   | 1.70 | 0.033127037 |
| SMAD7     | 1.69 | 0.007740857 |
| CAMK2N1   | 1.69 | 0.029777667 |
| OTUD1     | 1.68 | 0.040733711 |
| CD6       | 1.68 | 0.0366257   |
| ARL4C     | 1.68 | 0.006892211 |
| GPR155    | 1.67 | 0.045030606 |
| ADAMTSL5  | 1.67 | 0.040793598 |
| NCR3      | 1.67 | 0.033650098 |
| DTX1      | 1.66 | 0.035662512 |
| GPR137B   | 1.65 | 0.007538977 |
| APBB1     | 1.64 | 0.017888894 |
| LMTK3     | 1.64 | 0.003285611 |
| PBX1      | 1.64 | 0.028648986 |
| GADD45B   | 1.64 | 0.021745889 |
| MAP3K7CL  | 1.63 | 0.033898986 |
| SAT1      | 1.62 | 0.046758632 |
| KLRG1     | 1.62 | 0.027051992 |
| GPRIN3    | 1.60 | 0.046362476 |
| PSTPIP1   | 1.59 | 0.044936741 |
| NUGGC     | 1.59 | 0.029728041 |
| HEG1      | 1.57 | 0.024115879 |
| NFKB2     | 1.57 | 0.014419059 |
| TMEM158   | 1.56 | 0.021499596 |
| RAB11FIP4 | 1.56 | 0.04189561  |
| SIPA1L2   | 1.56 | 0.043511916 |
| HNRNPLL   | 1.54 | 0.004902559 |
| RNF149    | 1.53 | 0.045783287 |
| TNNC2     | 1.53 | 0.028859788 |
| MMD       | 1.52 | 0.005248438 |
| TNFAIP3   | 1.52 | 0.004397143 |
| MAST3     | 1.52 | 0.047989011 |
| PPP1R13B  | 1.51 | 0.040733711 |
| PTGS1     | 1.49 | 0.000561659 |
| SEMA4B    | 1.47 | 0.049897482 |
| DMPK      | 1.47 | 0.047701493 |
| HLA-G     | 1.40 | 0.013116657 |
| NTNG2     | 1.40 | 0.030610608 |
| PVRIG     | 1.38 | 0.032517889 |
| PRRT2     | 1.37 | 0.034505668 |
| FLT3LG    | 1.37 | 0.040386294 |



|            |       |             |
|------------|-------|-------------|
| EFHD2      | 1.33  | 0.044936741 |
| PLEKHG1    | 1.33  | 0.032727686 |
| BCL3       | 1.33  | 0.015205334 |
| GRK5       | 1.33  | 0.037516586 |
| TTC39B     | 1.32  | 0.040733711 |
| BRINP2     | 1.30  | 0.021125371 |
| FAM110A    | 1.29  | 0.009186177 |
| MEGF10     | 1.28  | 0.032480397 |
| LRP10      | 1.26  | 0.037552468 |
| AMPD2      | 1.26  | 0.012470729 |
| IRF2BPL    | 1.24  | 0.024056029 |
| SYNE1      | 1.23  | 0.035662512 |
| HGD        | 1.21  | 0.049817777 |
| NFKBIA     | 1.21  | 0.013735155 |
| ARHGAP9    | 1.20  | 0.033982336 |
| RASSF5     | 1.19  | 0.044935541 |
| VASP       | 1.19  | 0.037985423 |
| PFKFB3     | 1.18  | 0.024338967 |
| TADA2B     | 1.18  | 0.038563027 |
| CHD7       | 1.18  | 0.042688261 |
| KIF21B     | 1.17  | 0.017308174 |
| RASA3      | 1.17  | 0.002883077 |
| AC069368.1 | 1.17  | 0.040733711 |
| SBNO2      | 1.16  | 0.009529302 |
| JAK3       | 1.16  | 0.027051992 |
| OSGIN1     | 1.08  | 0.021464349 |
| TCAF2      | 1.05  | 0.044885209 |
| NMRK1      | 1.04  | 0.002613539 |
| MIDN       | 1.02  | 0.030610608 |
| MAP1LC3B2  | 1.02  | 0.031603011 |
| CST7       | 1.01  | 0.038285365 |
| SEMA3F     | -1.03 | 0.007538977 |
| TMEM237    | -1.05 | 0.019201377 |
| VSIG10     | -1.10 | 0.049726482 |
| POGLUT3    | -1.11 | 0.003055628 |
| CCDC34     | -1.22 | 0.001725747 |
| FBXO15     | -1.23 | 0.026809791 |
| PPP1R36    | -1.24 | 0.028845015 |
| KIF16B     | -1.29 | 0.040002278 |
| NT5DC2     | -1.32 | 0.019515085 |
| BCL7A      | -1.37 | 0.024811146 |
| MARCHF3    | -1.39 | 0.009186177 |
| CCT6B      | -1.39 | 0.010821483 |
| URAD       | -1.46 | 0.045783287 |
| ARHGEF39   | -1.50 | 0.030511106 |
| ACOT4      | -1.50 | 0.033891073 |
| SSPN       | -1.56 | 0.045860628 |
| ARMC9      | -1.58 | 0.033127037 |
| EPB41L1    | -1.63 | 0.045783287 |
| RIMKLA     | -1.78 | 0.044885209 |

|                 |       |             |
|-----------------|-------|-------------|
| B3GALNT1        | -1.82 | 0.017421601 |
| DCLK2           | -1.84 | 0.04551261  |
| CIQTNF4         | -1.85 | 0.04551261  |
| PTGR1           | -1.86 | 0.013907113 |
| TNFRSF19        | -1.90 | 0.047701493 |
| AMH             | -1.90 | 0.014419059 |
| CCL25           | -1.97 | 0.045860628 |
| SOCS2           | -1.98 | 0.042649094 |
| SLC12A5         | -1.98 | 0.049897482 |
| PCDHB2          | -2.00 | 0.032370032 |
| CBLN2           | -2.00 | 0.019006528 |
| FSTL1           | -2.02 | 0.040793598 |
| ALPK3           | -2.02 | 0.048598822 |
| GALR3           | -2.03 | 0.045976793 |
| SCUBE2          | -2.03 | 0.044885209 |
| SAXO2           | -2.04 | 0.023676295 |
| H1-3            | -2.05 | 0.042640687 |
| TRPA1           | -2.05 | 0.022311285 |
| FZD4            | -2.09 | 0.033903119 |
| KHDRBS3         | -2.11 | 0.047061952 |
| SH2D4A          | -2.12 | 0.034447682 |
| GUCY2D          | -2.14 | 0.024811146 |
| TPBG            | -2.15 | 0.027051992 |
| ALDH7A1         | -2.16 | 0.000880611 |
| TMEM132E        | -2.16 | 0.023818401 |
| NCS1            | -2.17 | 0.032727686 |
| MET             | -2.17 | 0.022084661 |
| NKD1            | -2.19 | 0.014160409 |
| SLC44A5         | -2.20 | 0.022084661 |
| KITLG           | -2.21 | 0.04835701  |
| SPAG6           | -2.21 | 0.044935541 |
| KIF26A          | -2.22 | 0.045030606 |
| SEZ6L2          | -2.23 | 0.038563027 |
| ZNF648          | -2.23 | 0.034367319 |
| UGT3A2          | -2.24 | 0.03218586  |
| PRG3            | -2.25 | 0.048019866 |
| KLRF2           | -2.25 | 0.0422533   |
| AADAC           | -2.26 | 0.030702379 |
| PRKD1           | -2.27 | 0.049817777 |
| HHIPL1          | -2.27 | 0.047061952 |
| MIP             | -2.27 | 0.037852112 |
| CRYGD           | -2.28 | 0.034272866 |
| SCN2A           | -2.29 | 0.044885209 |
| SLCO1B3-SLCO1B7 | -2.29 | 0.019663695 |
| ANGPT2          | -2.29 | 0.042239212 |
| AMOTL2          | -2.30 | 0.042640687 |
| LONRF2          | -2.30 | 0.018151863 |
| PPP1R27         | -2.31 | 0.038834979 |
| BEND4           | -2.34 | 0.033899265 |
| SLCO1B3         | -2.37 | 0.00937373  |

|          |       |             |
|----------|-------|-------------|
| BHLHE41  | -2.38 | 0.011307834 |
| TSKU     | -2.39 | 0.032480397 |
| VWA3B    | -2.41 | 0.036377476 |
| RASSF6   | -2.44 | 0.032370032 |
| HOXA13   | -2.44 | 0.022311285 |
| MYO1B    | -2.46 | 0.015076917 |
| ADGRL3   | -2.48 | 0.024136213 |
| PRXL2A   | -2.48 | 0.011339805 |
| MYMX     | -2.48 | 0.029360577 |
| JPH1     | -2.49 | 0.021977722 |
| SCG2     | -2.51 | 0.02061213  |
| MYRIP    | -2.51 | 0.012945974 |
| SLC44A3  | -2.55 | 0.016241583 |
| C2CD4B   | -2.60 | 0.005934077 |
| MMP7     | -2.60 | 0.007538977 |
| SMO      | -2.61 | 0.002499855 |
| KCNIP3   | -2.62 | 0.013987858 |
| FERMT1   | -2.62 | 0.002692987 |
| GPX8     | -2.63 | 0.025747157 |
| VWDE     | -2.64 | 0.012913179 |
| NDST3    | -2.64 | 0.010954028 |
| C8orf48  | -2.64 | 0.016339657 |
| GPC5     | -2.65 | 0.013055714 |
| SMAD9    | -2.69 | 0.013492064 |
| IGLON5   | -2.69 | 0.011877937 |
| SLC16A2  | -2.70 | 0.004708501 |
| CCDC8    | -2.73 | 0.0029912   |
| AIF1L    | -2.73 | 0.005632332 |
| SRPX     | -2.74 | 0.008573763 |
| DNAJC12  | -2.76 | 0.006181868 |
| CNN3     | -2.76 | 0.003386334 |
| TEAD4    | -2.83 | 0.004926138 |
| ARSL     | -2.87 | 0.002596374 |
| GOLGA8M  | -2.89 | 0.003194937 |
| EPCAM    | -2.89 | 0.004561715 |
| SCN9A    | -2.90 | 0.004385227 |
| PI15     | -2.93 | 1.14632E-08 |
| RASSF10  | -2.96 | 0.008072511 |
| H1-5     | -3.02 | 0.002892602 |
| ZNF214   | -3.03 | 0.001093202 |
| PTPRG    | -3.09 | 0.001959552 |
| CLSTN2   | -3.18 | 0.000561659 |
| CDH4     | -3.21 | 0.001093202 |
| VSTM4    | -3.29 | 0.000731444 |
| SCARA3   | -3.30 | 0.000561659 |
| ARHGAP44 | -3.40 | 0.000544122 |
| C2orf72  | -3.42 | 0.000618989 |
| PARD3B   | -3.51 | 0.000396384 |
| GPC4     | -3.55 | 0.000189798 |

---

**Supplemental Table 3.** Genes differentially represented in TIM-3<sup>Lo</sup> and TIM-3<sup>Hi</sup> CD45<sup>+</sup>CD3<sup>-</sup>CD56<sup>+</sup> NK cells AML patients as determined by RNA-sequencing.
